# Supplementary material
Source: publisher site journal article supplement (https://oneecosystem.pensoft.net/article/download/suppl/3931336/)
Supplement: Supplementary file 1

Site,Dist,Tree number,Perimeter,BHD,Height
EastFacing,0,1A,84.4,26.9,16.4
EastFacing,0,2A,98,31.2,19.3
EastFacing,0,3A,85,27.1,17.9
EastFacing,0,4A,55,17.5,17.8
EastFacing,0,5A,89,28.3,18.9
EastFacing,0,6A,80.5,25.6,17.1
EastFacing,0,7A,87,27.7,16.9
EastFacing,0,8A,97.1,30.9,12.3
EastFacing,0,9A,96.1,30.6,20
EastFacing,0,10A,48.3,15.4,17.8
EastFacing,0,11A,98,31.2,18.7
EastFacing,0,12A,78,24.8,19.2
EastFacing,0,13A,76.8,24.4,16.8
EastFacing,0,14A,80,25.5,19.8
EastFacing,0,15A,72.7,23.1,21.3
EastFacing,0,16A,57.2,18.2,15.85
EastFacing,0,17A,85.8,27.3,20.35
EastFacing,0,18A,58.8,18.7,20.3
EastFacing,0,19A,69,22,18.2
EastFacing,0,20A,76.1,24.2,17
EastFacing,0,21A,74.1,23.6,22.5
EastFacing,0,22A,84.9,27,18.05
EastFacing,0,23A,75.1,23.9,20.3
EastFacing,0,24A,82.8,26.4,21.4
EastFacing,0,25A,71.5,22.8,22.65
EastFacing,0,26A,79.3,25.2,18.95
EastFacing,0,27A,70.5,22.4,21.5
EastFacing,0,28A,65.9,21,19.65
EastFacing,0,29A,87.1,27.7,23.2
EastFacing,0,30A,87.1,27.7,19.2
EastFacing,-60,1B,85.3,27.2,21.05
EastFacing,-60,2B,95.1,30.3,21.6
EastFacing,-60,3B,117.6,37.4,23.55
EastFacing,-60,4B,90.3,28.7,23.1
EastFacing,-60,5B,86.6,27.6,23.4
EastFacing,-60,6B,85.8,27.3,24.6
EastFacing,-60,7B,74.9,23.8,22.3
EastFacing,-60,8B,66,21,21.25
EastFacing,-60,9B,79.5,25.3,20.05
EastFacing,-60,10B,90.4,28.8,17.95
EastFacing,-60,11B,85.5,27.2,18.1
EastFacing,-60,12B,65,20.7,19.1
EastFacing,-60,13B,109.3,34.8,18.75
EastFacing,-60,14B,60.4,19.2,20.35
EastFacing,-60,15B,112.1,35.7,24.85
EastFacing,-60,16B,74.8,23.8,23
EastFacing,-60,17B,90.3,28.7,24.25
EastFacing,-60,18B,80.9,25.8,23.6
EastFacing,-60,19B,108.6,34.6,24.2
EastFacing,-60,20B,70.4,22.4,25.7
EastFacing,-60,21B,82.3,26.2,20.65
EastFacing,-60,22B,91.6,29.2,24.35
EastFacing,-60,23B,98.5,31.4,23.5
EastFacing,-60,24B,94.5,30.1,22.5
EastFacing,-60,25B,69.9,22.2,20.75
EastFacing,-60,26B,97.1,30.9,22.9
EastFacing,-60,27B,97.3,31,19.25
EastFacing,-60,28B,102.5,32.6,22.5
EastFacing,-60,29B,87,27.7,19.7
EastFacing,-60,30B,70.3,22.4,21.5
EastFacing,-120,1C,71.7,22.8,24.2
EastFacing,-120,2C,59.5,18.9,18.65
EastFacing,-120,3C,94.9,30.2,22.5
EastFacing,-120,4C,87.8,27.9,21.55
EastFacing,-120,5C,102.8,32.7,23.7
EastFacing,-120,6C,55,17.5,20.7
EastFacing,-120,7C,84.8,27,24.15
EastFacing,-120,8C,75.6,24.1,20.85
EastFacing,-120,9C,74.7,23.8,22.4
EastFacing,-120,10C,103.4,32.9,24.9
EastFacing,-120,11C,68.8,21.9,21.9
EastFacing,-120,12C,100,31.8,24.9
EastFacing,-120,13C,74.7,23.8,22.7
EastFacing,-120,14C,69.6,22.2,24.8
EastFacing,-120,15C,63.5,20.2,21.85
EastFacing,-120,16C,78.9,25.1,22.25
EastFacing,-120,17C,107.3,34.2,25.85
EastFacing,-120,18C,85.5,27.2,23.85
EastFacing,-120,19C,83.4,26.5,23.95
EastFacing,-120,20C,102.6,32.7,21.8
EastFacing,-120,21C,81,25.8,18.8
EastFacing,-120,22C,77,24.5,23.3
EastFacing,-120,23C,66.9,21.3,25.6
EastFacing,-120,24C,82.6,26.3,23.7
EastFacing,-120,25C,87.5,27.9,22.95
EastFacing,-120,26C,60.7,19.3,22.75
EastFacing,-120,27C,88.3,28.1,20.85
EastFacing,-120,28C,85.3,27.2,21.05
EastFacing,-120,29C,77.7,24.7,23.25
EastFacing,-120,30C,78.4,25,24.8
WestFacing,0,1D,89,28.3,23.4
WestFacing,0,2D,66,21,20.5
WestFacing,0,3D,75.5,24,23.6
WestFacing,0,4D,60.5,19.3,20.8
WestFacing,0,5D,53.2,16.9,15.8
WestFacing,0,6D,52.5,16.7,13.85
WestFacing,0,7D,75.1,23.9,20
WestFacing,0,8D,81.8,26,21.7
WestFacing,0,9D,70.4,22.4,21.6
WestFacing,0,10D,97.3,31,21.6
WestFacing,0,11D,71,22.6,19.6
WestFacing,0,12D,74.4,23.7,21.4
WestFacing,0,13D,68.2,21.7,20.1
WestFacing,0,14D,83.3,26.5,20.5
WestFacing,0,15D,93,29.6,22.5
WestFacing,0,16D,64.6,20.6,23.3
WestFacing,0,17D,93.6,29.8,23.5
WestFacing,0,18D,54.7,17.4,15.3
WestFacing,0,19D,86.7,27.6,20.1
WestFacing,0,20D,74,23.6,23.1
WestFacing,0,21D,60.2,19.2,19.3
WestFacing,0,22D,72,22.9,20.2
WestFacing,0,23D,87.6,27.9,21.5
WestFacing,0,24D,97.1,30.9,24.7
WestFacing,0,25D,75.9,24.2,21.1
WestFacing,0,26D,51,16.2,13.8
WestFacing,0,27D,104.4,33.2,24.8
WestFacing,0,28D,65.2,20.8,13.9
WestFacing,0,29D,85.2,27.1,22.1
WestFacing,0,30D,81.1,25.8,21.8
WestFacing,-60,1E,73.6,23.4,22
WestFacing,-60,2E,53.1,16.9,20.4
WestFacing,-60,3E,56.9,18.1,25.3
WestFacing,-60,4E,31.9,10.2,14.7
WestFacing,-60,5E,79.6,25.3,28.2
WestFacing,-60,6E,82.8,26.4,25.3
WestFacing,-60,7E,103,32.8,29.6
WestFacing,-60,8E,61.3,19.5,22.7
WestFacing,-60,9E,101,32.1,29
WestFacing,-60,10E,91.4,29.1,28.4
WestFacing,-60,11E,124.2,39.5,29.6
WestFacing,-60,12E,103.1,32.8,28.5
WestFacing,-60,13E,90.6,28.8,28
WestFacing,-60,14E,110.8,35.3,27.9
WestFacing,-60,15E,93.3,29.7,27.3
WestFacing,-60,16E,84.2,26.8,26.1
WestFacing,-60,17E,79.3,25.2,24.8
WestFacing,-60,18E,59.9,19.1,22.6
WestFacing,-60,19E,88.8,28.3,26.2
WestFacing,-60,20E,73.7,23.5,23.4
WestFacing,-60,21E,107.4,34.2,27.3
WestFacing,-60,22E,85.9,27.3,27.5
WestFacing,-60,23E,87.6,27.9,27.1
WestFacing,-60,24E,93.8,29.9,24.5
WestFacing,-60,25E,74,23.6,25.4
WestFacing,-60,26E,75.7,24.1,22.3
WestFacing,-60,27E,72.6,23.1,24.8
WestFacing,-60,28E,88.1,28,26.5
WestFacing,-60,29E,87.6,27.9,26
WestFacing,-60,30E,60.4,19.2,20.7
WestFacing,-120,1F,70.8,22.5,28
WestFacing,-120,2F,110.1,35,27.6
WestFacing,-120,3F,105.4,33.5,26.4
WestFacing,-120,4F,45.5,14.5,16.9
WestFacing,-120,5F,59.6,19,24.9
WestFacing,-120,6F,93.6,29.8,28
WestFacing,-120,7F,35.4,11.3,14.9
WestFacing,-120,8F,25.6,8.1,16.2
WestFacing,-120,9F,91,29,25.6
WestFacing,-120,10F,92.2,29.3,29.4
WestFacing,-120,11F,56.1,17.9,21.1
WestFacing,-120,12F,102.6,32.7,26.8
WestFacing,-120,13F,84.9,27,27.1
WestFacing,-120,14F,73.2,23.3,26.7
WestFacing,-120,15F,89.4,28.5,26.2
WestFacing,-120,16F,55.5,17.7,21.2
WestFacing,-120,17F,106,33.7,28
WestFacing,-120,18F,91.8,29.2,27.3
WestFacing,-120,19F,83.9,26.7,25.2
WestFacing,-120,20F,57.9,18.4,22.6
WestFacing,-120,21F,80.5,25.6,30.5
WestFacing,-120,22F,63.5,20.2,22.8
WestFacing,-120,23F,91.8,29.2,25.5
WestFacing,-120,24F,45.4,14.5,21.4
WestFacing,-120,25F,98,31.2,26.7
WestFacing,-120,26F,51.1,16.3,21.4
WestFacing,-120,27F,64.3,20.5,25
WestFacing,-120,28F,84,26.7,27.4
WestFacing,-120,29F,112.9,35.9,28.8
WestFacing,-120,30F,59.7,19,22.2
